# Supplementary material for: GC Insights: Fostering transformative change for biodiversity restoration through transdisciplinary research
Source: Copernicus journal article supplement (doi:10.5194/gc-7-57-2024), 2024-02-01

Supplement of Geosci. Commun., 7, 57–61, 2024  
<https://doi.org/10.5194/gc-7-57-2024-supplement>  
© Author(s) 2024. CC BY 4.0 License.

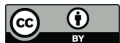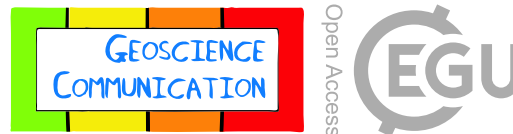

*Supplement of*

## **GC Insights: Fostering transformative change for biodiversity restoration through transdisciplinary research**

**Bikem Ekberzade et al.**

*Correspondence to:* Chloe Hill ([policy@egu.eu](mailto:policy@egu.eu))

The copyright of individual parts of the supplement might differ from the article licence.

# Four-targets of the Kunming-Montréal Global Biodiversity Framework

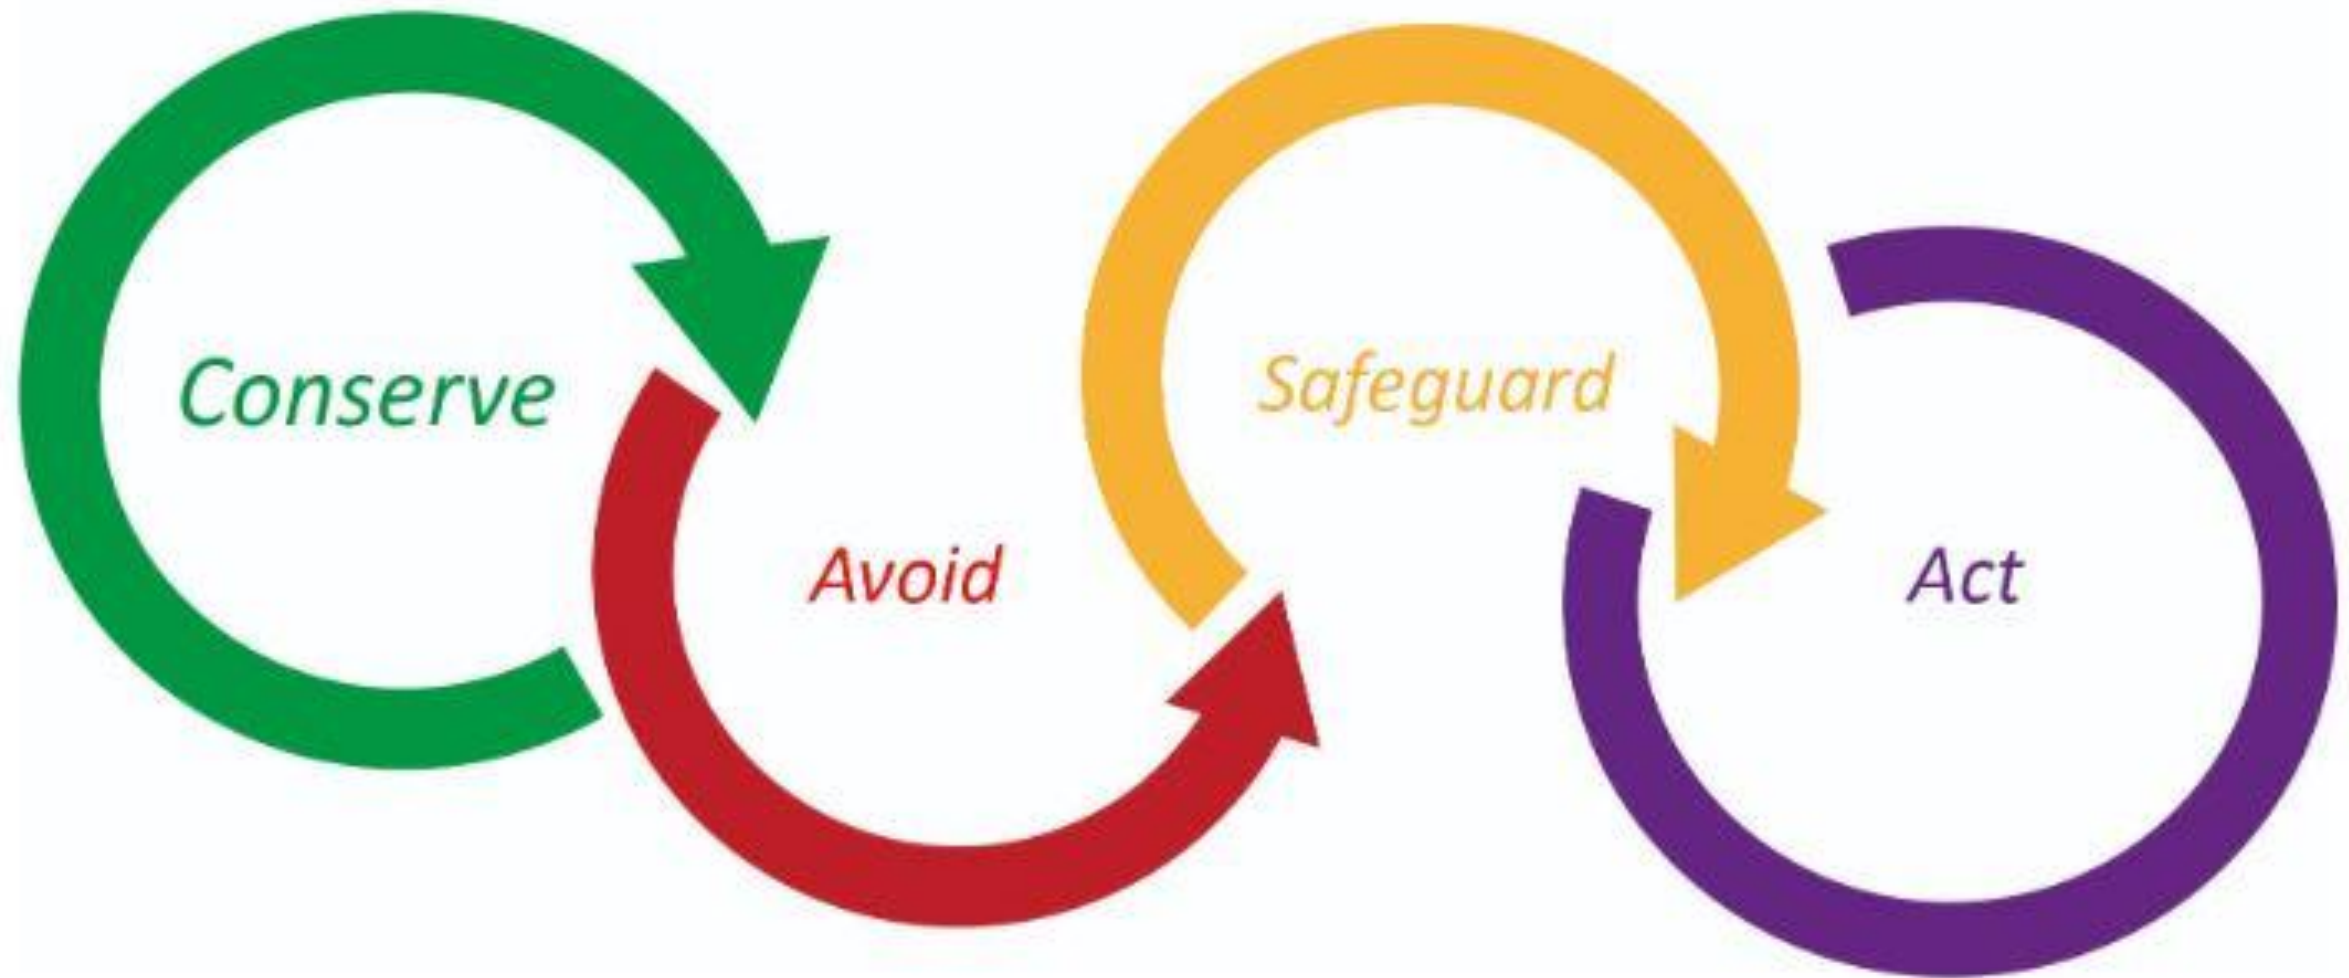

Supplement: Supplementary file 1 [file gc-7-57-2024-supplement.pdf]
